**Long-term Exposure to Ambient PM<sub>2.5</sub> and Hospitalizations for Myocardial Infarction  
among U.S. Residents: A Difference-in-Differences Analysis**

Yichen Wang<sup>a\*</sup>, BS; Xinye Qiu<sup>a</sup>, PhD; Yaguang Wei<sup>a</sup>, PhD; Joel D. Schwartz<sup>a,b</sup>, PhD

<sup>a</sup> Department of Environmental Health, Harvard T.H. Chan School of Public Health, Boston,  
MA, USA

<sup>b</sup> Department of Epidemiology, Harvard T.H. Chan School of Public Health, Boston, MA, USA

\*Corresponding author: Yichen Wang, Department of Environmental Health, Harvard T.H. Chan  
School of Public Health, 401 Park Drive, Boston, MA 02215 USA. Email:  
[yichenwang@hsph.harvard.edu](mailto:yichenwang@hsph.harvard.edu)

**Total word count: 6710**

---

## 1 **Abstract**

2 **Background:** Air pollution has been recognized as an untraditional risk factor for myocardial  
3 infarction (MI). However, the MI risk attributable to long-term exposure to fine particulate matter  
4 (PM<sub>2.5</sub>) is unclear, especially in younger populations, and few studies represented the general  
5 population.

6 **Methods:** We applied the difference-in-differences approach to estimate the relationship between  
7 annual PM<sub>2.5</sub> exposure and hospitalizations for MI among U.S. residents and further identified  
8 potential susceptible subpopulations. All hospital admissions for MI in ten U.S. states over the  
9 period 2002-2016 were obtained from the Healthcare Cost and Utilization Project State Inpatient  
10 Database.

11 **Results:** In total, 1,914,684 MI hospital admissions from 8,106 ZIP codes in ten states from 2002  
12 to 2016 were included in this study. We observed a 1.35% (95% CI: 1.11-1.59%) increase in MI  
13 hospitalization rate for 1 µg/m<sup>3</sup> increase in annual PM<sub>2.5</sub> exposure. The estimate was robust to  
14 adjustment for surface pressure, relative humidity and co-pollutants. In the population with  
15 exposure at or below 12 µg/m<sup>3</sup>, there was a larger increment of 2.17% (95% CI: 1.79-2.56%) in  
16 hospitalization rate associated with 1 µg/m<sup>3</sup> increase in PM<sub>2.5</sub>. Young people (0-34 years) and  
17 elderly people (≥75 years) were the two most susceptible age groups. Residents living in more  
18 densely populated or poorer areas and individuals with comorbidities were observed to be at a  
19 greater risk.

20 **Conclusions:** This study indicates long-term residential exposure to PM<sub>2.5</sub> could lead to increased  
21 risk of MI among U.S. general population. The association persists below current standards.

22 **Keywords:** Long-term PM<sub>2.5</sub> exposure; Difference-in-differences; Myocardial infarction;  
23 Hospitalizations

---

## 24 **Clinical Perspective:**

### 25 **What is new?**

- 26 • Long-term exposure to PM<sub>2.5</sub> increased the risk of myocardial infarction in the general U.S.  
27 population.
- 28 • Young individuals aged 0-34 years had the highest relative risk from long-term exposure  
29 to PM<sub>2.5</sub>, and elderly people aged  $\geq 75$  years were the second most susceptible to the effects.
- 30 • Individuals with iron deficiency anemia, psychosis, and renal failure were more susceptible  
31 to the long-term effects of PM<sub>2.5</sub> on MI.

### 32 **What are the clinical implications?**

- 33 • Long-term PM<sub>2.5</sub> exposure is one of the important modifiable environmental risk factors  
34 for myocardial infarction, therefore, air pollution control and behavioral interventions  
35 should be taken to prevent the occurrence of myocardial infarction.

36

37

38

39

## 40 **1. Introduction**

41 Myocardial infarction (MI) is responsible for years of life lost and reduced life expectancy  
42 across the globe (Ojha and Dhamoon, 2022). Over the last few decades, the morbidity and  
43 mortality burden of MI has declined in developed countries due to improved healthcare systems  
44 and preventive actions (Camacho et al., 2022). However, an increasing incidence of MI over time  
45 has been reported in younger populations with its underlying reasons unclarified (Arora et al., 2019;  
46 Yang et al., 2020).

47 Over 90% of the risk for acute MI is accounted for by modifiable risk factors (Chadwick  
48 Jayaraj et al., 2019). Air pollution is an important driver of MI with a population attributable  
49 fraction of 5-7%, (Nawrot et al., 2011). This is similar to well-recognized behavioral factors (e.g.,  
50 physical exertion, alcohol, and coffee). To date, the epidemiological evidence on the relationship  
51 between long-term exposure to ambient fine particulate matter  $\leq 2.5$   $\mu\text{m}$  in aerodynamic diameter  
52 ( $\text{PM}_{2.5}$ ) and MI remains inconclusive. Some studies suggested a positive association (Hartiala et  
53 al., 2016; Madrigano et al., 2013), whereas other research did not observe a significant risk  
54 associated with  $\text{PM}_{2.5}$ . According to a recent review article, the risk of incident MI could be  
55 increased by 8% (95% CI: -1-18%) per  $10\text{-}\mu\text{g}/\text{m}^3$  increase in long-term  $\text{PM}_{2.5}$  exposure, but the  
56 association is evidently weaker as compared to other cardiovascular end points (Alexeeff et al.,  
57 2021). In addition, most of the studies used data from cohorts that were not representative of the  
58 general population and mostly involving the participants over middle age, such as the  
59 EuroTARGET cohort (Gandini et al., 2018) and the Nurses' Health Study cohort (Puett et al.,  
60 2009). Seldom has the effect modification by age been explored in the general population, which,  
61 however, is important for understanding the role of air pollution in MI occurrence at earlier ages  
62 and potentially different risk profiles among age groups.

63 Furthermore, concerns are raised in terms of the lack of causal interpretability in the  
64 existing literature. In contrast to randomized controlled trials (RCTs) that balance covariates across  
65 treatment classes via randomization, observational studies are the most powerful method available  
66 to study the health effect of air pollution, since randomization to exposure is not possible. Standard  
67 observational studies control for potential confounders in the outcome regression, but are often  
68 criticized for the potential for omitted confounders. Several alternative causal modeling  
69 approaches have been applied in air pollution epidemiology to attempt to mimic randomized trials

---

70 (Reich et al., 2021). The generalized propensity score is one example for investigating the health  
71 effects of continuous pollution exposure. It can remove the confounding bias by measured  
72 covariates and give population marginal effect estimates by balancing the covariates among  
73 different exposure levels (Schwartz et al., 2021; Wei et al., 2020). Nevertheless, the propensity  
74 score method is not able to control for the unmeasured confounders. The difference-in-differences  
75 (DID) is a classical quasi-experimental estimator in econometrics designed to control for  
76 unmeasured variables (Ashenfelter and Card, 1985; McEwan, 2010). To date, several studies have  
77 applied the DID approach to evaluate the effects of time-varying PM<sub>2.5</sub> exposure and industrial air  
78 pollution on mortality (Leogrande et al., 2019; J. Schwartz et al., 2021; Wang et al., 2016; Yitshak-  
79 Sade et al., 2019). This modeling design only examines variations in exposure and outcome within  
80 geographic locations (in our case ZIP codes), thereby removing any confounding by measured or  
81 unmeasured confounders that differ between ZIP codes. It controls for unmeasured confounders  
82 that vary over time similarly in all ZIP codes using indicator variables for each calendar year.  
83 Measured covariates are controlled for as usual. Therefore, the model framework provides a robust  
84 tool to add control for many unmeasured confounders to traditional observational epidemiology.

85       Using the DID modeling approach, we investigated the effects of annual ambient PM<sub>2.5</sub> on  
86 the hospital admission rate for MI in residents of all ages across ten states of the United States  
87 during 2002-2016. Hospitalization data were accessed from the Health Cost and Utilization Project  
88 State Inpatient Databases. Furthermore, we examined whether age could modify the relationships.  
89 We also explored the effect modification by community socioeconomic status (SES) indicators  
90 and individual comorbidities.

## 91 **2. Methods**

### 92 *2.1. Assessment of air pollution*

---

93 Daily predictions of ambient fine particulate matter (PM<sub>2.5</sub>), nitrogen dioxide (NO<sub>2</sub>), and  
94 ozone (O<sub>3</sub>) were derived from an ensemble of machine learning algorithms using geographically  
95 weighted regression at a resolution of 1 km × 1 km in the contiguous United States. The prediction  
96 model involved critical environmental measures from air monitoring data, meteorological  
97 conditions, chemical transport model simulations, land-use features, and satellite remote sensing  
98 data of aerosol optical depth, and the model was validated with a 10-fold cross-validation (Di et  
99 al., 2020, 2019). We computed the exposure for each ZIP code and each year by averaging the grid  
100 cell predictions whose centroids were inside the ZIP code polygons or assigning the nearest grid  
101 cell predictions for the ZIP codes that do not have polygon representations, and then linked the  
102 exposure data to participants based on their residential ZIP code and admission year. To explore  
103 the potential lag effects of air pollution on MI hospitalizations, we used moving averages of air  
104 pollution data in the admission year and one year before.

## 105 **2.2. Outcome measurement**

106 The inpatient care records used in this study were obtained from the Healthcare Cost and  
107 Utilization Program (HCUP) State Inpatient Database (SID) (HCUP Databases, 2021; Qiu et al.,  
108 2023, 2022; Steiner et al., 2002). The database has a 97% completeness of all U.S. community  
109 hospital discharges. More details about the inpatient databases and data availability are provided  
110 in the Supplement.

111 We analyzed the hospital admission data in the following listed states and years: Arizona  
112 (AZ), Michigan (MI), North Carolina (NC), New York (NY), Rhode Island (RI), Washington  
113 (WA), New Jersey (NJ) from 2002 to 2016, Maryland (MD, 2009-2016), Georgia (GA, 2010-  
114 2016), and Wisconsin (WI, 2012-2016). The inconsistent inclusion of the study years across these  
115 states was based on data availability from the States. The hospitalizations for principal diagnosis

---

116 of MI were identified with reference to the International Classification of Diseases (ICD) codes  
117 (ICD-9: 410; ICD-10: I21).

### 118 **2.3. Covariates**

119 Demographic information for each participant comprising age, sex, race, admission year,  
120 state, and ZIP code of residence for that year were obtained from the SIDs. Other covariates  
121 included in the models were selected based on our prior knowledge, such as ambient seasonal  
122 temperature, and area-level SES and behavioral factors. The SES data at the ZIP code tabulation-  
123 area level (ZCTA) were downloaded from the U.S. Census for 2002 Summary File 3 and 2011  
124 Summary File 1 (Bureau, U. S. C., 2011, 2002). They were interpolated annually between census  
125 years, and further extrapolated using the American Community Surveys after 2010 (Bureau, U. S.  
126 C., 2020). They included the percent of female residents, percent of black residents, median  
127 household income, percent of residents having high school education or less, and population  
128 density. The percent of residents over the age of 65 years living in poverty was additionally used  
129 as a proxy for SES. We defined the ZIP codes where the percent of persons  $\geq 65$  years old living  
130 in poverty was within the lowest 25<sup>th</sup> percentile among all areas (i.e.,  $< 7\%$ ) as low-level poverty  
131 areas and other ZIP codes as poorer areas. We also linked in the county-level yearly percentage of  
132 residents who ever smoked and mean body mass index (BMI) from the Centers for Disease Control  
133 and Prevention (CDC) Behavioral Risk Factor Surveillance System (BRFSS) (Bureau, U. S. C.,  
134 2020), which were converted to ZCTA-level based on the county and updated annually. Ambient  
135 daily surface temperature and daily average surface pressure at a  $12 \text{ km} \times 12 \text{ km}$  resolution were  
136 obtained from the National Aeronautics and Space Administration's Land Data Assimilation  
137 System (NLDAS-2). In light of the seasonal effect of temperature on cardiovascular health (Shi et  
138 al., 2015; Stewart et al., 2017), we generated two metrics of temperature, i.e., the average

---

139 temperature in the warm months (April-September) and the average temperature in the cold  
140 months (October-March). The ambient annual average level of daily maximum relative humidity  
141 at a 4 km × 4 km resolution was obtained from the gridMET dataset (Abatzoglou, 2013).  
142 Temperature, surface pressure, and relative humidity data were later aggregated to ZIP codes and  
143 years.

#### 144 **2.4. Comorbidity data**

145 In this study, we considered several coexisting medical conditions that are likely to impact  
146 the vulnerability of MI patients exposed to PM<sub>2.5</sub> in the secondary analysis, which included:  
147 hypertension (Yang et al., 2022), diabetes mellitus (DM), chronic obstructive pulmonary disease  
148 (COPD) (Croft et al., 2022; Rich et al., 2010; Wynands et al., 2022), renal failure (Bo et al., 2021),  
149 iron deficiency anemias (IDA) (Pereira and Sarnak, 2003), obesity (Weichenthal et al., 2014),  
150 peripheral vascular disorders (PVD) (Bauersachs et al., 2019; Gwon et al., 2021), depression  
151 (Gładka et al., 2018), other neurological disorders (Shi et al., 2020), and psychoses (Larsen and  
152 Christenfeld, 2009; Qiu et al., 2023, 2022). The comorbidity data was assigned to the MI inpatients  
153 using the AHRQ comorbidity software and stored in the Disease Severity Measures file as a part  
154 of SIDs. The comorbidity data are available from 2005 to 2015. The identification of comorbidities  
155 is based on International Classification of Diseases, 9th revision, Clinical Modification (ICD-9-  
156 CM) diagnoses and the Diagnosis-Related Group (DRG) in effect on the discharge date.

#### 157 **2.5. Statistical analysis**

158 We used the DID approach to estimate the relationship between long-term exposure to  
159 ambient PM<sub>2.5</sub> and the incidence of hospital admissions for MI. The analysis was limited to the  
160 ZIP code-year combinations with a population of more than 100 to reduce the noise from low-  
161 population areas and increase the analytical power (Qiu et al., 2022). First, we calculated the



162 annual aggregated counts of hospital admissions for MI for each ZIP code, year, and age group (0-  
 163 34, 35-54, 55-64, 65-74,  $\geq 75$  years). We fitted a quasi-Poisson regression to account for the  
 164 overdispersion of MI hospitalization counts. The equation is given below:

$$165 \quad \ln(E(Y_{z,t,k})) = \beta_0 + \beta_1 PM_{2.5\ z,t} + \beta_2 Z_z + \beta_3 U_t + \beta_4 I_k + \beta_5 W_{z,t} + \ln(P_{z,t,k})$$

166 where  $Y_{z,t,k}$  represents the aggregated count of hospitalizations for MI in ZIP code  $z$ , year  
 167  $t$  and age group  $k$ ;  $PM_{2.5\ z,t}$  represents the mean ambient  $PM_{2.5}$  concentration for the same stratum  
 168 of ZIP code  $z$  and year  $t$ ;  $Z_z$  is a dummy variable for ZIP code which captures all time-invariant or  
 169 slowly changing variables that vary across ZIP code areas, measured or unmeasured;  $U_t$  is a  
 170 dummy variable for year  $t$  which represents the time-varying variables whose temporal variation  
 171 is similar across ZIP code areas;  $I_k$  is a dummy variable for age groups;  $W_{z,t}$  represents the  
 172 variables that may vary differently over time across ZIP code areas;  $\ln(P_{z,t,k})$  is an offset term  
 173 that represents the natural log of the population in ZIP code  $z$ , year  $t$  and age group  $k$ .

174 The essence of the DID method is to account for all differences across ZIP codes using  
 175 indicator variables, and only examine the within ZIP code variation in exposure and outcome. This  
 176 controls for all slowly changing covariates, measured or unmeasured, that vary across ZIP codes.  
 177 Omitted confounders that vary similarly over time across ZIP codes are controlled using indicator  
 178 variables for year. Time-varying confounders that vary over time differently across ZIP codes must  
 179 be measured and controlled as usual. More statistical details can be found elsewhere (Wang et al.,  
 180 2016).

181 In our DID model, the spatial confounding was controlled for by fitting individual  
 182 intercepts for each ZIP code. The time trends were controlled by using an indicator for each year. ,  
 183 We controlled for time-varying estimates of average warm-season and cold-season temperatures,  
 184 percentage of female residents, percentage of black residents, median household income, percent

---

185 of education level under high school, population density, percentage of residents who ever smoked,  
186 percentage aged  $\geq 65$  years old living in poverty, and mean BMI in this paper. We assumed no  
187 other covariates that are both correlated with exposure and outcome can change differentially over  
188 time across ZIP codes were left out other than these adjusted variables. In the ecological design,  
189 the individual-level risk factors that displayed temporal variabilities were unrelated to the exposure  
190 and therefore would not confound the association. Therefore, the estimates given by the model can  
191 reflect the changes in MI morbidity attributable to the changes in ambient  $PM_{2.5}$ .

192 To test the robustness of the effect estimate, we further controlled for surface pressure and  
193 relative humidity, respectively. We also constructed two- and multi-pollutant models to control for  
194 potential confounding by  $NO_2$ , and  $O_3$ . Moreover, we explored the variation in the effect estimates  
195 across age subgroups by including an interaction term for an indicator of age subgroups and the  
196  $PM_{2.5}$  term. We additionally examined the potential effect modification by some typical area-level  
197 SES indicators that could illustrate the degree of urbanity, i.e., poverty level, medium household  
198 income, population density, and education level.

199 We performed two secondary analyses. First, we restricted the analysis to the residents who  
200 lived in the areas with annual exposure consistently at or below the annual standard of  $12 \mu g/m^3$   
201 set by National Ambient Air Quality Standards (NAAQS) over the study period. For the above  
202 analysis, the percent change in hospitalization rate for MI and their 95% confidence intervals (CIs)  
203 per  $\mu g/m^3$  increase in long-term average  $PM_{2.5}$  level were reported. Second, we employed the case-  
204 only analysis to examine whether the following individual-level comorbidities could be effect  
205 modifiers: hypertension, DM, COPD, renal failure, IDA, obesity, PVD, depression, other  
206 neurological disorders, and psychoses. The case-only method was suggested by Armstrong (2003)  
207 to study modification by effectively time-invariant individual factors in research of time-varying

208 environmental factors to identify the susceptible groups. For each comorbidity type, we performed  
209 a logistic regression model of the ambient PM<sub>2.5</sub> on the comorbidity status adjusted for the time  
210 trend among the MI inpatients. The exposure-modifier interaction odds ratio (OR) and 95% CIs  
211 were reported.

212 All analyses were performed using R software version 4.1.2. A two-sided p-value <0.05  
213 was considered statistically significant.

### 214 **3. Results**

#### 215 *3.1. Characteristics of community conditions and MI hospitalizations*

216 In total, we included 1,914,684 hospital admissions for MI from 8,106 ZIP codes (with a  
217 population over 100) in 10 U.S. states from 2002 to 2016. The air pollution, temperature,  
218 demographic and SES characteristics averaged over the study period in these ZIP codes are  
219 presented in **Table 1**. Over the study period, the average long-term annual PM<sub>2.5</sub> concentration  
220 was 8.9±2.6 µg/m<sup>3</sup> among all the ZIP code areas. The average temperatures in the warm season  
221 and in the cold season were 19.0±3.7 and 4.7±4.8 °C, respectively. On average, female residents,  
222 ever smokers, or residents who received high school education or less accounted for about half of  
223 the ZIP code-level population. In addition, there was evidence of spatial heterogeneity in several  
224 community-level demographic and SES covariates. For example, the population density differed  
225 substantially across ZIP codes with its 10<sup>th</sup> and 90<sup>th</sup> percentiles of 9 and 2,062 persons/mi<sup>2</sup>,  
226 respectively. The 10<sup>th</sup> and 90<sup>th</sup> percentiles in the percentage of the low-education population (≤high  
227 school) ranged between 25.2% and 63.6%.

228 **Table 2** shows the total and age subgroup-specific number of hospitalizations for MI and  
229 the corresponding average hospital admission rate among the included ZIP codes during the study  
230 period. Among all 1,914,684 MI cases, the highest hospital admission rate was occurring in

231 patients aged at least 75 years old, which accounted for 35.98% of total MI hospitalizations. The  
232 proportions of MI hospital admissions in 45-54, 55-64, and 65-74 age groups were lower than that  
233 in the oldest group, being 14.20, 21.92, and 22.51%, respectively. In contrast, the age group aged  
234 0-34 years old only included 0.79% of total hospitalizations for MI. The annual admission rate in  
235 the general population across all ZIP code areas shows an increasing pattern with age group: The  
236 highest ZIP code-level annual hospitalization rate for MI of 10.62‰ was observed in the oldest  
237 age group ( $\geq 75$  years), while lower hospitalization rates were seen in younger age groups.

### 238 *3.2. Main effects of long-term PM<sub>2.5</sub> exposures on MI risk*

239 **Table 3** shows the estimated effects of PM<sub>2.5</sub> on MI risk in the general population using  
240 different models. If the model assumptions are met, these are causal estimates. Overall, we  
241 observed a 1.35% (95% CI: 1.11-1.59%) increase in the hospitalization rate for every 1- $\mu\text{g}/\text{m}^3$   
242 increase in PM<sub>2.5</sub> exposure. The estimate was stable after further adjusting for surface pressure or  
243 relative humidity. In the model further adjusted for NO<sub>2</sub> or O<sub>3</sub>, the adverse effects of PM<sub>2.5</sub> on the  
244 risk of MI were slightly attenuated, which corresponded to 1.23% (95% CI: 0.99-1.47%) and 1.18%  
245 (95% CI: 0.94-1.42%) increase in hospital admission rate associated with 1  $\mu\text{g}/\text{m}^3$  increase in PM<sub>2.5</sub>,  
246 respectively. In the model adjusted for NO<sub>2</sub> and O<sub>3</sub> simultaneously, the effect estimate was similar  
247 and remained significant. Moreover, we also restricted the main analysis to the ZIP codes where  
248 the annual PM<sub>2.5</sub> exposures were always below 12  $\mu\text{g}/\text{m}^3$  over the study period. A higher increment  
249 of 2.17% (95% CI: 1.79-2.56%) in hospitalization rate for MI was observed per 1- $\mu\text{g}/\text{m}^3$  increase  
250 in the low-level PM<sub>2.5</sub> exposures.

### 251 *3.3. Heterogeneity of susceptibilities among age subgroups*

252 **Figure 1** and **Table S1** show the variation in estimates for annual PM<sub>2.5</sub> and hospitalization  
253 for MI across six age subgroups. In detail, the subgroups aged 0-34 and  $\geq 75$  years appeared to have

254 the highest relative risks for chronic exposures to PM<sub>2.5</sub>. For every 1- $\mu\text{g}/\text{m}^3$  increase in annual  
255 PM<sub>2.5</sub>, there was a 2.40% (95% CI: 1.62-3.20%) and a 1.94% (95% CI: 1.69-2.20%) increase in  
256 the hospitalization rate in 0-34 years and  $\geq 75$  age subgroups, respectively. Every 1- $\mu\text{g}/\text{m}^3$  increase  
257 in PM<sub>2.5</sub> was associated with an increment of 1.32% (95% CI: 0.93-1.70%) in the hospitalization  
258 rate for MI among the subpopulation aged 35-44 years old. In contrast, the lowest relative risks for  
259 PM<sub>2.5</sub> were observed in the subpopulations with ages 45-54, 55-64, and 65-74 years.

### 260 *3.4 Effect modifications by area-level SES covariates*

261 **Figure 2** and **Table S2** illustrate the potential effect modification by several area-level SES  
262 covariates on the relationship between PM<sub>2.5</sub> and the risk of MI. We found significant effect  
263 modification by area-level poverty ( $p_{\text{interaction}}=0.0497$ ). Specifically, the population living in the  
264 poorer areas was more susceptible to long-term PM<sub>2.5</sub> exposures as compared to those living in  
265 lower-poverty areas. In addition, population density significantly modified the association ( $p_{\text{interaction}}<0.0001$ ). The result suggests that people living in more populated geographical areas  
266 tended to have a higher risk of MI attributed to long-term PM<sub>2.5</sub> exposures. However, the  
267 association was not modified by either median household income ( $p_{\text{interaction}}=0.5190$ ) or education  
268 level ( $p_{\text{interaction}}=0.6640$ ), despite a tendency of the higher risk occurring in the population with  
269 lower median household income and lower education level.  
270

### 271 *3.5. Effect modifications by individual comorbidities*

272 We also investigated whether the association between long-term PM<sub>2.5</sub> and hospitalizations  
273 for MI could differ by individual-level comorbidities using the data from 2005 to 2015. The results  
274 of the case-only analysis are shown in **Figure 3** and **Table S3**. The risk of MI due to chronic  
275 exposures to PM<sub>2.5</sub> was significantly higher in individuals with most of the common comorbidities  
276 than in those without it: hypertension, DM, COPD, renal failure, IDA, obesity, PVD, other

277 neurological disorders, and psychoses. The strongest modifying effect was observed in individuals  
278 with comorbid IDA ( $p_{\text{interaction}} < 0.0001$ ). The odds of hospitalizations for MI was increased by 5.6%  
279 (95% CI: 5.3-5.8%) for each 1- $\mu\text{g}/\text{m}^3$  increase in  $\text{PM}_{2.5}$  associated with comorbid psychoses.  
280 However, we found that having depression may decrease the susceptibility to  $\text{PM}_{2.5}$  exposures  
281 (OR=0.995; 95% CI: 0.991-0.998).

#### 282 **4. Discussion**

283 In this study, we used hospital inpatient records from HCUP SIDs covering all admissions  
284 in ten states in the U.S. and performed a DID analysis to estimate the relationship between long-  
285 term exposure to ambient  $\text{PM}_{2.5}$  and the risk of hospitalizations for MI. In the entire population,  
286 we found that the incidence of MI would increase by 1.35% (95% CI: 1.11-1.59%) for every 1-  
287  $\mu\text{g}/\text{m}^3$  increase in long-term residential  $\text{PM}_{2.5}$  exposure. The effect was robust to adjustment for  
288 surface pressure, relative humidity and co-pollutants (i.e.,  $\text{NO}_2$  and/or  $\text{O}_3$ ). Effects remained and  
289 were stronger when limited to locations that never exceeded U.S. EPA's air quality standards, were  
290 larger in poorer neighborhoods, and were increased in persons with chronic conditions most of  
291 which are more common in minorities. A key aspect of this analysis is that the population studied  
292 is the total population of those states, and not the selected sample of most cohort studies. This  
293 makes the findings more generally applicable and the coefficients more useful for calculating  
294 attributable risks. The findings that people with iron deficiency anemia, psychosis, and renal  
295 failure were more susceptible to the effects of  $\text{PM}_{2.5}$  on MI are novel, and the other effect  
296 modification (hypertension, diabetes, COPD) findings add to a thin literature.

297 Less attention has been paid to the long-term effects of  $\text{PM}_{2.5}$  as compared to their acute  
298 effects (Cai et al., 2016; Zhu et al., 2021); however, an additional 10% risk is estimated for long-  
299 term exposure than for short-term exposures to  $\text{PM}_{2.5}$ , partially due to deteriorated cardiometabolic

300 conditions over time (Rajagopalan et al., 2018). Therefore, our research supplements the limited  
301 evidence in this regard. The risk of hospitalization for MI was slightly attenuated when NO<sub>2</sub> and/or  
302 O<sub>3</sub> were accounted for as confounding factors. It is important to note that NO<sub>2</sub> and O<sub>3</sub> are  
303 associated with certain components of PM<sub>2.5</sub>. In particular, NO<sub>2</sub> is associated with secondary  
304 organic particles and O<sub>3</sub> with secondary inorganic (sulfate and nitrate) particles. Hence controlling  
305 for them may remove the effects of important PM components. Indeed a personal exposure study  
306 reported that ambient NO<sub>2</sub> and O<sub>3</sub> were not associated with personal exposure to NO<sub>2</sub> and O<sub>3</sub> but  
307 were associated with personal exposure to PM<sub>2.5</sub> (Valli, 2001). This suggests that three pollutant  
308 models risk biasing downward the PM<sub>2.5</sub> effect as the gases may not be confounders. This change  
309 may also be due to the potential positive association for NO<sub>2</sub> with MI (Roswall et al., 2017). The  
310 possible confounding by O<sub>3</sub> might be explained by its potential to amplify cardiovascular effects  
311 (Malik et al., 2019; Weichenthal et al., 2017), which, however, remains unclear because of its  
312 complex dynamics and interaction with other typical air pollutants that may vary with seasons (Ito  
313 et al., 2007; Mustafić et al., 2012).

314         Moreover, we observed that the increased risk was stronger at or below annual PM<sub>2.5</sub>  
315 concentrations of 12 µg/m<sup>3</sup> which is an indication of a curvilinear concentration-response function  
316 (CRF). Such a CRF has been noted previously. For example, Vodonos et al. (2018) in a meta-  
317 analysis of 54 cohort studies reported a similar shape in the association of both all-cause mortality  
318 and cardiovascular mortality. The Global Exposure Mortality Model study reported a similar  
319 finding, with a steeper slope for ischemic heart disease mortality below 12 µg/m<sup>3</sup> (Burnett et al.,  
320 2018). Possible reasons for such a pattern include adaptation, different chemical compositions of  
321 particles in locations with lower exposure, a different ratio of surface area to mass in higher  
322 concentration locations where particles tend to be larger due to agglomeration, etc. Overall, our

323 results highlight that there is a significant health threat even under low-level long-term exposures  
324 and that pollution control measures should be prioritized to protect public health.

325 Our main finding is in accordance with some recent evidence. For example, Danesh Yazdi  
326 et al. (2019) observed a 2.6% (95% CI: 2.4-2.8%) increase in the hazard of first hospital admission  
327 for MI associated with each 1  $\mu\text{g}/\text{m}^3$  increase in average annual  $\text{PM}_{2.5}$  concentration among  
328 Medicare participants over 65 years or older in seven southeastern states in the U.S. A study  
329 targeted the entire adult population in Ontario, Canada reported an ~3% increase in the risk of MI  
330 incidence per  $\mu\text{g}/\text{m}^3$  increase in long-term exposure to  $\text{PM}_{2.5}$  (Chen et al., 2020). Among 118,229  
331 individuals in a large-scale and population-based Chinese cohort, an increment of 10  $\mu\text{g}/\text{m}^3$   
332 increase in  $\text{PM}_{2.5}$  was associated with a higher risk of acute MI (HR=1.28; 95% CI, 1.19-1.39) (Li  
333 et al., 2020). Hystad et al. (2020) found that a hazard ratio of 1.03 (95% CI: 1.00-1.05) per 10  
334  $\mu\text{g}/\text{m}^3$  increase in long-term ambient  $\text{PM}_{2.5}$  and a population-attributable fraction of 8.4% (95%  
335 CI: 0.0-15.4%) for MI in the Prospective Urban and Rural Epidemiology cohort comprising  
336 157,436 adults from 21 countries. Nevertheless, some researchers reported null associations of  
337 long-term  $\text{PM}_{2.5}$  with MI (Cesaroni et al., 2014; Lipsett et al., 2011; Miller et al., 2007). The  
338 nationwide Danish Nurse Cohort Study reported a higher risk of fatal MI induced by  $\text{PM}_{2.5}$ , but  
339 did not suggest any association with overall incident MI (Cramer et al., 2020). Aside from the  
340 statistical approaches and study period, the differential magnitudes of the effect among the studies  
341 may be due to differences in demographic structure, prevailing concentrations, since the  
342 association appears curvilinear but linear models were fit, physiological characteristics (e.g.,  
343 medical history, comorbidities), or SES factors (e.g., poverty, healthcare accessibility) of the study  
344 population. Diverse sources and constituents of ambient  $\text{PM}_{2.5}$  across different regions can also  
345 explain the difference in the toxicity and the triggering of MI (Rich et al., 2013).



346 Multiple pathways by which PM<sub>2.5</sub> can affect the myocardium have been heavily  
347 elaborated, which are linked to oxidative stress, endothelial dysfunction, systemic immunity  
348 response, systemic inflammatory response, and autonomic nervous system injuries (Langrish et al.,  
349 2012; Rajagopalan et al., 2018; Wang et al., 2013; Wang et al., 2016; Zhao et al., 2013); these  
350 physiological responses could further contribute to the development of atherosclerosis, the widely  
351 believed main trigger and underlying disease process of MI onset (Palasubramaniam et al., 2019).  
352 MI progression could be accelerated by disturbed cardiac mitochondrial function and dynamics  
353 followed by impaired redox metabolism and inflammation in the lung due to chronic exposure to  
354 PM<sub>2.5</sub> inhalation (Marchini et al., 2022). More pathological evidence of specific molecular  
355 signaling pathways is also emerging. For example, toxicological experiments revealed that the  
356 down-regulation of microRNA-205 induced by PM<sub>2.5</sub> could stimulate myocardial inflammation  
357 and cardiac dysfunction (Feng et al., 2020). Hu et al. (2021) demonstrated that NLRP3  
358 inflammasome activation is responsible for PM<sub>2.5</sub>-induced endothelial cell dysfunction. These  
359 uncovered biological mechanisms well support our findings.

360 We provide novel evidence into the health disparities across age groups in terms of the  
361 relationship under investigation. Our evidence of high sensitivity in the oldest age group is in line  
362 with prior studies (Bai et al., 2019; Li et al., 2020). It could result from reduced physiological,  
363 metabolic and compensatory processes, as well as the heavier health burden of cardiopulmonary  
364 disorders in the elderly (Shumake et al., 2013). It might be also attributed to declined antioxidant  
365 defense ability of the respiratory tract lining fluid in the elderly population (Kelly et al., 2003). We  
366 also found a surprisingly high susceptibility in young individuals, which has been seldom explored  
367 or discussed before. A similar finding was suggested in a Canadian study where the researchers  
368 observed a strong association of MI incidence in relation to PM<sub>2.5</sub> between 35-44 years-old adults

369 and 75-85 years-old adults (Bai et al., 2019). In comparison, we extended the scope to a large  
370 sample size of multiple age groups and found that the susceptibility in individuals aged 0-34 years  
371 was higher than that in the middle-aged groups and slightly higher than that in those aged  $\geq 75$ . It  
372 is important to note that the baseline risk in the younger individuals was two orders of magnitude  
373 lower than in the oldest category, so a high relative risk is still a small attributable risk. These  
374 findings might be partially due to the longer time spent outdoors by younger people than by elder  
375 people. It's also possible that a potentially immature immune system in adolescents may increase  
376 their vulnerability (Frcpe et al., 2006). More importantly, while the traditional risk factors for MI  
377 such as underlying atherosclerosis are less common in younger populations, their unique risk  
378 profile is linked to behavioral and psychosocial factors (e.g., recreational drug use) which may add  
379 to the risk of cardiovascular events (Gulati et al., 2020). Abundant evidence concludes cocaine use  
380 is a strong risk factor for MI (DeFilippis et al., 2018; Phillips et al., 2009; Schwartz et al., 2010).  
381 These risk factors may convey susceptibility to these individuals to the inflammatory response  
382 induced by  $PM_{2.5}$ . On the other hand, if cocaine usage is correlated with  $PM_{2.5}$  exposure, it may be  
383 a confounder.

384 In addition, we observed that population living in poorer areas or densely populated areas  
385 may be more susceptible to the risk of MI attributed to chronic exposures to  $PM_{2.5}$ . The evidence  
386 of differential susceptibility to exposure in low-income areas, combined with the already  
387 established higher exposure levels and poorer healthcare accessibility in socioeconomically  
388 disadvantaged areas (Colmer et al., 2020; Wang et al., 2017) identifies this as a key environmental  
389 justice issue. Although increased susceptibility to  $PM_{2.5}$ -related health impacts accompanied by  
390 SES disadvantage has been well recognized (Bravo et al., 2016; Chi et al., 2016; Xu et al., 2020),  
391 the effect modification by neighboring SES factors in the association of MI risk with long-term

---

392 PM<sub>2.5</sub> exposures is little discussed, and present conclusions on this topic are mixed. Several studies  
393 did not identify significant differences across levels of neighborhood-level sociodemographic  
394 characteristics (Hystad et al., 2020; Madrigano et al., 2013; Weaver et al., 2019). In contrast, the  
395 evidence of effect modification by annual household income was suggested in long-term adult  
396 residents of Ontario (Bai et al., 2019), which differed from our study. Our present finding can  
397 provide a novel understanding of potential susceptible subpopulations and facilitate clarification  
398 of social drivers for substantial geographic disparities in MI across the U.S. (Camacho et al., 2022;  
399 Yu et al., 2021).

400 In line with prior epidemiological studies, we identified a statistically elevated risk of MI  
401 associated with long-term PM<sub>2.5</sub> exposure among patients with diabetes than those without  
402 (Cramer et al., 2020; Hart et al., 2015; McGuinn et al., 2016). We also found that hypertension,  
403 COPD, renal failure, IDA, obesity, PVD, and unfavorable neurological conditions may increase  
404 the vulnerability to the risk of MI in relation to PM<sub>2.5</sub>, which has not been widely appreciated or  
405 documented in the past. Higher insulin resistance and oxidative stress may enhance the alteration  
406 of ventricular repolarization and systemic inflammation triggered by PM<sub>2.5</sub> and thus exacerbate  
407 myocardial vulnerability to arrhythmias (Schneider et al., 2010), which might provide a possible  
408 explanation for our conclusion. The strongest effect of IDA may be due to stimulated oxidative  
409 stress, decreased blood supply, myocardial hypoxia, and the close interplay of the outcomes  
410 (Inserte et al., 2021; Padda et al., 2021). Additionally, we assume the intake of psychotropic  
411 medications may exacerbate the susceptibility since they are known to cause undesirable  
412 cardiometabolic effects (Abosi et al., 2018; Mohamed et al., 2019). A much lower chance of  
413 adherence to cardiovascular disease medication and healthcare-seeking behaviors to prevent  
414 physical illness among many psychiatric patients (especially those with severe mental illness)

---

415 might also contribute to an increased risk of MI events (Druss et al., 2001; Newcomer and  
416 Hennekens, 2007). However, comorbid depression, which showed a protective effect, remains  
417 unclear. Further investigations on the specific impacts and mechanisms of comorbidities are  
418 warranted.

419         There are multiple strengths in the present study. To begin with, we used high coverage  
420 (97%) medical records across multiple U.S. states over a long period, which enabled the statistical  
421 power to be sufficient and expanded the generalizability of our findings. Furthermore, in the DID  
422 modeling framework, we eliminated confounding by variables that change slowly over time and  
423 minimized the confounding by the variables that showed parallel variations in time across area  
424 units, thus overcoming the limitations of data availability by design. We also fully adjusted for  
425 multiple area-level demographic, SES, and behavioral covariates to relax the assumptions.  
426 Additionally, in light of underappreciated cardiovascular risk among younger individuals, we  
427 performed the analysis with fine divisions of age and revealed the strong susceptibility in young  
428 people. Additionally, we determined multiple common individual comorbid conditions as potential  
429 susceptibility factors. With this investigation, we aimed to raise the public health concern towards  
430 sensitive groups and implement more targeted preventative measures both in pollution control and  
431 healthcare services.

432         However, some limitations should also be acknowledged. First, despite high resolution of  
433 the air pollution predictions, the PM<sub>2.5</sub> estimates only represent the ambient exposure level within  
434 a specific ZIP code area and year but were not based on personal exposures which are influenced  
435 by activity patterns, air exchange rates, second-hand tobacco smoke, and other factors that lead to  
436 them differing, often substantially, from neighborhood exposure. However, Weisskopf and  
437 Webster (2017) have pointed out that personal exposure is correlated with many potential

---

438 confounders (e.g. stress while driving) that are not associated with outdoor concentration, and  
439 hence outdoor exposures can act as instrumental variables for the personal exposure. Further, the  
440 National Human Activity Pattern Survey in the U.S. reported that U.S. adults spent 69% of their  
441 time at home and 8% of the time immediately outside their home (Klepeis et al., 2001), making it  
442 reasonable to use neighborhood ambient pollution to capture their exposure to ambient pollution.  
443 Nevertheless, our model clearly does not capture personal exposure. While there is likely a  
444 considerable difference between the personal exposure of individuals living in a neighborhood and  
445 the ambient concentration in that neighborhood, the difference between the personal and ambient  
446 is likely to be mostly Berksonian exposure error since it represents individual variation around a  
447 group mean. As such, it should not produce much bias in the effect estimates in an epidemiology  
448 study. A recent simulation study showed that even in the presence of substantial Berksonian  
449 exposure error, little bias would be found in an epidemiology study (Wei et al., 2022). Second, the  
450 DID approach should be better understood as a more robust approach to confounding control that  
451 addresses some omitted confounders rather than as an approach that addresses all of them.  
452 However, since we used indicator variables for every ZIP code, our analysis is only examining  
453 year-to-year exposure within ZIP code, and hence ZIP code differences between e.g. high and low  
454 SES ZIP codes are controlled by design. Within ZIP code, we have controlled for time-varying  
455 SES variables, but we acknowledge we were not able to control for all. For example, we did not  
456 have data on occupation. However, since the DID approach eliminates any contrasts between ZIP  
457 codes, and the exposure assigned to all individuals within a ZIP code is the same, it is unlikely that  
458 such factors could be associated with exposure. Third, differential exposure histories and other  
459 risk factors such as diets across areas are overlooked because of the unknown human migration  
460 patterns in this study, which may have resulted in a wrong recognition of the true cause of MI

---

461 hospitalizations. Finally, we aggregated the hospital admissions by strata defined by ZIP code,  
462 year, and age, therefore, potentially low numbers in some age subpopulation in less populated  
463 geographical areas could add noise to the analysis.

## 464 **5. Conclusions**

465 In this study, we found that long-term exposures to ambient PM<sub>2.5</sub> increased the risk of MI  
466 hospitalization. The relationship remained significant after controlling for surface pressure,  
467 relative humidity and concurrent exposures to NO<sub>2</sub> and O<sub>3</sub>. A more pronounced adverse  
468 association was observed at or below the annual PM<sub>2.5</sub> limit enacted by NAQSS. In addition, we  
469 observed higher susceptibility to the PM<sub>2.5</sub>-related MI risk among young people and elderly people,  
470 residents living in poorer or highly populated areas, and individuals with a comorbid burden. Our  
471 study highlights the roles of air pollution being one important environmental risk factor for MI,  
472 gives insights into the underlying susceptible subpopulations, and informs the future strategies to  
473 control air pollution and mitigate related health disparities.

474

## 475 **Acknowledgments**

476 We want to offer special thanks to U.S. Agency for Healthcare Research and Quality Health  
477 Cost and Utilization Project (HCUP) for giving us access to the State Inpatient Databases (SIDs)  
478 to conduct this study.

## 479 **Sources of Funding**

480 This work was made possible by U.S. Environmental Protection Agency (EPA) grant RD-  
481 835872. Its contents are solely the responsibility of the grantee and do not necessarily represent  
482 the official views of the U.S. EPA. Further, U.S. EPA does not endorse the purchase of any  
483 commercial products or services mentioned in the publication. This work was also supported by

484 National Institutes of Health (NIH) grant R01 ES032418-01 and National Institute of  
 485 Environmental Health Sciences (NIEHS) grant (P30 ES000002).

486 **Disclosures**

487 None.

488

489

490

491

492

493

494

495 **Table 1.** Distribution of ZIP code-level annual PM<sub>2.5</sub> and covariates from 2002 through 2016.

| ZIP code-level covariates*                    | Mean (SD)      | Percentile |        |        |        |         |
|-----------------------------------------------|----------------|------------|--------|--------|--------|---------|
|                                               |                | 10th       | 25th   | 50th   | 75th   | 90th    |
| Annual PM <sub>2.5</sub> (µg/m <sup>3</sup> ) | 8.9 (2.6)      | 5.4        | 7.2    | 8.9    | 10.5   | 12.4    |
| Annual NO <sub>2</sub> (ppb)                  | 17.6 (10.0)    | 7.4        | 10.1   | 14.8   | 23.3   | 31.9    |
| Annual O <sub>3</sub> (ppb)                   | 39.0 (3.9)     | 34.7       | 37.3   | 38.9   | 40.5   | 44.0    |
| Warm season temperature<br>(°C)               | 19.0 (3.7)     | 15.0       | 16.3   | 18.1   | 21.6   | 23.9    |
| Cold season temperature (°C)                  | 4.7 (4.8)      | -0.8       | 0.9    | 4.3    | 7.8    | 11.1    |
| Surface pressure (Pa)                         | 95,668 (2,980) | 94,187     | 94,267 | 94,330 | 98,118 | 100,097 |
| Relative humidity (%)                         | 84.8 (10.6)    | 74.9       | 83.8   | 87.6   | 90.4   | 92.9    |
| Percent female (%)                            | 50.3 (3.6)     | 47.7       | 49.4   | 50.6   | 51.8   | 53.0    |

|                                                  |                    |        |        |        |        |        |
|--------------------------------------------------|--------------------|--------|--------|--------|--------|--------|
| Percent black (%)                                | 9.9 (17.1)         | 0.2    | 0.5    | 2.2    | 10.5   | 31.6   |
| Median household income (\$)                     | 54,044<br>(23,198) | 32,364 | 39,049 | 48,130 | 63,069 | 83,717 |
| Percent $\geq 65$ below poverty                  | 13.2 (8.5)         | 4.33   | 7.06   | 11.53  | 17.06  | 24.17  |
| Population density<br>(persons/mi <sup>2</sup> ) | 1,109 (3,866)      | 9      | 23     | 96     | 753    | 2,062  |
| Percent education $\leq$ high<br>school          | 46.0 (14.6)        | 25.2   | 35.9   | 47.7   | 56.9   | 63.6   |
| Ever smokers (%)                                 | 48.0 (7.5)         | 39.0   | 43.3   | 47.6   | 52.5   | 57.4   |
| Mean BMI (kg/m <sup>2</sup> )                    | 27.6 (1.1)         | 26.3   | 26.9   | 27.5   | 28.2   | 29.0   |

496 \* Air pollutant concentration data were the moving averages of the year and the previous year.

497

498

499 **Table 2.** Summary of total and age-specific hospitalizations for MI from 2002 through 2016.

|             | Number of hospitalizations (%) <sup>*</sup> | Annual rate of<br>hospitalization (%) <sup>**</sup> |
|-------------|---------------------------------------------|-----------------------------------------------------|
| Total       | 1,914,684                                   | 1.40                                                |
| Age (years) |                                             |                                                     |
| 0-34        | 15,215 (0.79)                               | 0.03                                                |
| 35-44       | 87,893 (4.59)                               | 0.68                                                |
| 45-54       | 271,937 (14.20)                             | 1.91                                                |
| 55-64       | 419,733 (21.92)                             | 3.55                                                |
| 65-74       | 431,071 (22.51)                             | 5.70                                                |



---

$\geq 75$                       688,835 (35.98)                      10.62

---

500 \*The number of hospitalizations for MI was represented in N (%).

501 \*\*The annual rate of hospitalization was averaged across ZIP code areas.

502

503 **Table 3.** Percent change in hospitalization rate for MI per 1- $\mu\text{g}/\text{m}^3$  increase in long-term

504 exposure to  $\text{PM}_{2.5}$  in the main model, in models adjusted for surface pressure (SP) or relative

505 humidity (RH), in models adjusted for  $\text{NO}_2$  and/or  $\text{O}_3$ , and in the low-level exposure analysis.

| <b>Models</b>                                 | <b>Percent change in MI<br/>hospitalization rate (95%<br/>CI)</b> |
|-----------------------------------------------|-------------------------------------------------------------------|
| Main model                                    | 1.35 (1.11, 1.59)                                                 |
| Adjusted for SP                               | 1.34 (1.10, 1.58)                                                 |
| Adjusted for RH                               | 1.35 (1.10, 1.59)                                                 |
| Adjusted for $\text{NO}_2$                    | 1.23 (0.99, 1.47)                                                 |
| Adjusted for $\text{O}_3$                     | 1.18 (0.94, 1.42)                                                 |
| Adjusted for $\text{NO}_2$ and $\text{O}_3$   | 1.18 (0.94, 1.43)                                                 |
| Low-level exposures to<br>$\text{PM}_{2.5}$ * | 2.17 (1.79, 2.56)                                                 |

506 \*The analysis for low-level exposures to  $\text{PM}_{2.5}$  was restricted to the areas where the population

507 was continuously exposed to  $\text{PM}_{2.5}$  concentrations at or below 12  $\mu\text{g}/\text{m}^3$  over 2002-2016.

508

509

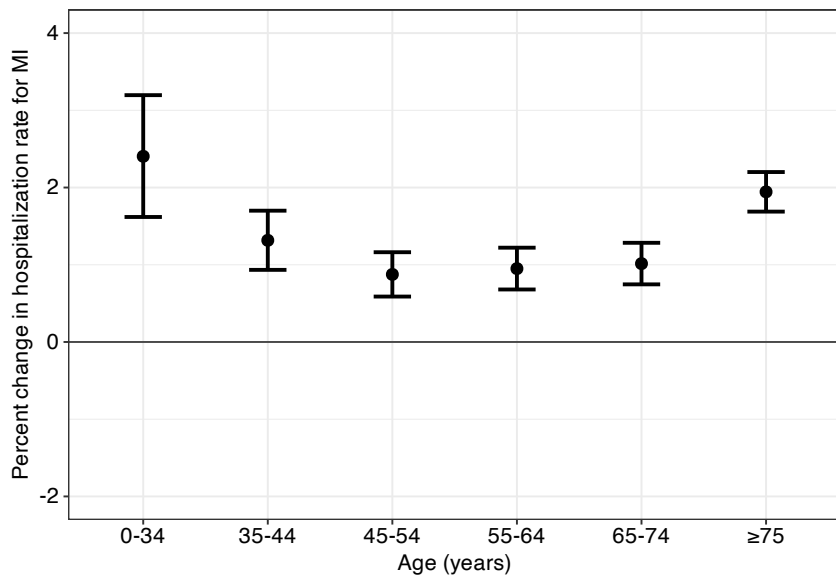

510

511 **Figure 1.** Percent change in hospitalization rate for MI per  $1\text{-}\mu\text{g}/\text{m}^3$  increase in long-term512 exposure to  $\text{PM}_{2.5}$  across different age subgroups.

513

514

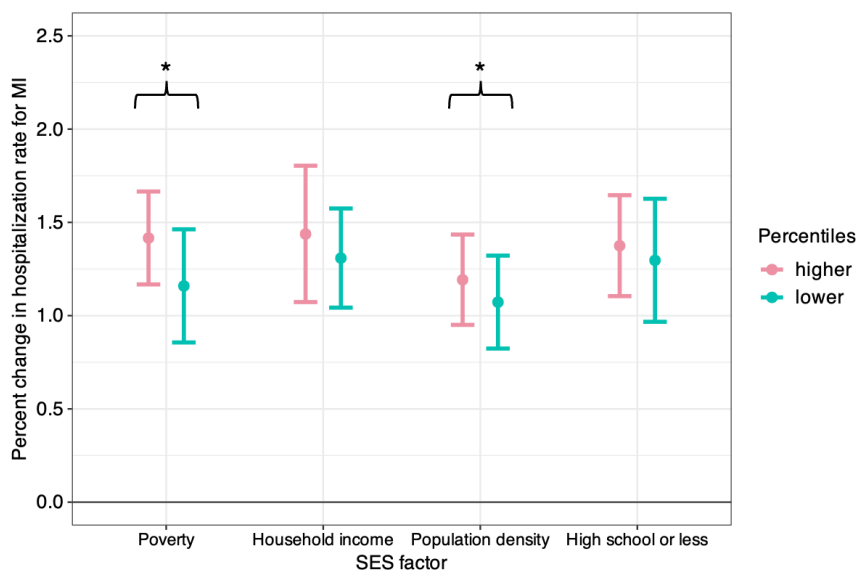

515

516 **Figure 2.** Percent change in hospitalization rate for MI per  $1\text{-}\mu\text{g}/\text{m}^3$  increase in long-term exposure517 to  $\text{PM}_{2.5}$  at the different percentiles of potential SES modifiers.

518 \* indicates the statistical significance of the modifier ( $p_{\text{interaction}} < 0.05$ ). For the percent of residents  
 519  $\geq 65$  years old living in poverty, the data below the 25<sup>th</sup> percentile (i.e.,  $< 7\%$  percent; defined as  
 520 low-level poverty areas) compared to the data at or above the 25<sup>th</sup> percentile (i.e.,  $\geq 7\%$  percent;  
 521 defined as poorer areas). For median household income, population density, and percent education  
 522 level  $\leq$  high school, the effects of  $\text{PM}_{2.5}$  were compared between the 10<sup>th</sup> and 90<sup>th</sup> of the modifier  
 523 level.

524

525

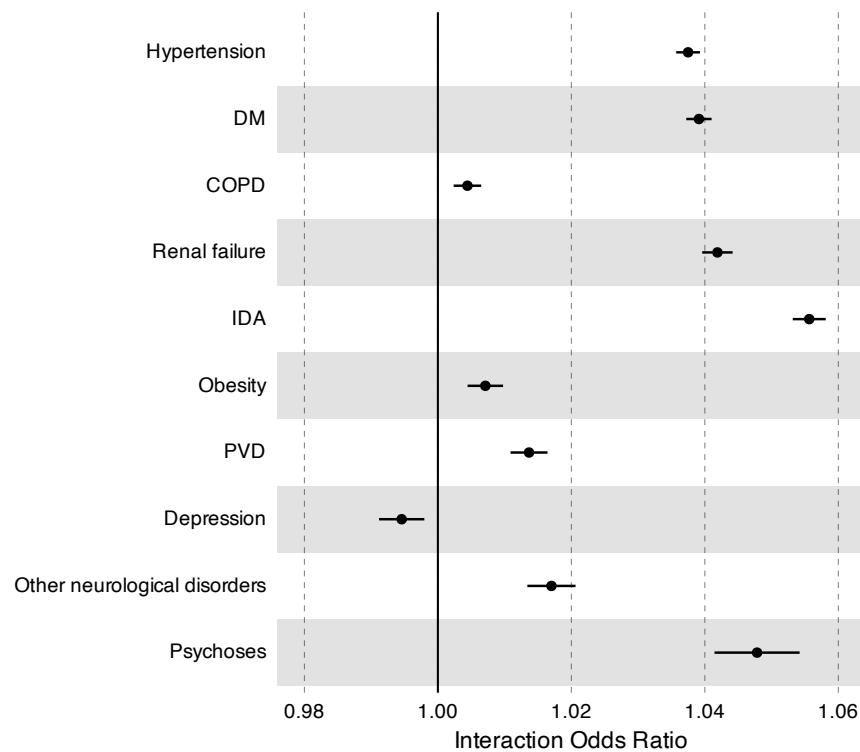

526

527 **Figure 3.** Interaction Odds Ratio (OR) for hospitalization for MI per  $\mu\text{g}/\text{m}^3$  increase in long-term  
 528 exposure to  $\text{PM}_{2.5}$  comparing individuals with and without comorbidities.

529 DM, diabetes mellitus; COPD, chronic obstructive pulmonary disease; IDA, iron deficiency  
 530 anemia; PVD, peripheral vascular disorders.

531

532 **References:**

533 Abatzoglou, J.T., 2013. Development of gridded surface meteorological data for ecological  
534 applications and modelling. *Int. J. Climatol.* 33, 121–131.

535 <https://doi.org/10.1002/joc.3413>

536 Abosi, O., Lopes, S., Schmitz, S., Fiedorowicz, J.G., 2018. Cardiometabolic effects of  
537 psychotropic medications. *Hormone Molecular Biology and Clinical Investigation* 36.

538 <https://doi.org/10.1515/hmbci-2017-0065>

539 Alexeeff, S.E., Liao, N.S., Liu, X., Van Den Eeden, S.K., Sidney, S., 2021. Long-Term PM<sub>2.5</sub>  
540 Exposure and Risks of Ischemic Heart Disease and Stroke Events: Review and Meta-

541 Analysis. *JAHA* 10, e016890. <https://doi.org/10.1161/JAHA.120.016890>

542 Armstrong, B.G., 2003. Fixed Factors that Modify the Effects of Time-Varying Factors:

543 Applying the Case-Only Approach: *Epidemiology* 14, 467–472.

544 <https://doi.org/10.1097/01.ede.0000071408.39011.99>

545 Arora, S., Stouffer, G.A., Kucharska-Newton, A.M., Qamar, A., Vaduganathan, M., Pandey, A.,  
546 Porterfield, D., Blankstein, R., Rosamond, W.D., Bhatt, D.L., Caughey, M.C., 2019.

547 Twenty Year Trends and Sex Differences in Young Adults Hospitalized With Acute

548 Myocardial Infarction: The ARIC Community Surveillance Study. *Circulation* 139,

549 1047–1056. <https://doi.org/10.1161/CIRCULATIONAHA.118.037137>

550 Ashenfelter, O., Card, D., 1985. Using the Longitudinal Structure of Earnings to Estimate the  
551 Effect of Training Programs. *MIT Press* 67, 648–660.

552 Bai, L., Shin, S., Burnett, R.T., Kwong, J.C., Hystad, P., van Donkelaar, A., Goldberg, M.S.,

553 Lavigne, E., Copes, R., Martin, R.V., Kopp, A., Chen, H., 2019. Exposure to ambient air

- 554 pollution and the incidence of congestive heart failure and acute myocardial infarction: A  
555 population-based study of 5.1 million Canadian adults living in Ontario. *Environment*  
556 *International* 132, 105004. <https://doi.org/10.1016/j.envint.2019.105004>
- 557 Bauersachs, R., Zeymer, U., Brière, J.-B., Marre, C., Bowrin, K., Huelsebeck, M., 2019. Burden  
558 of Coronary Artery Disease and Peripheral Artery Disease: A Literature Review.  
559 *Cardiovascular Therapeutics* 2019, e8295054. <https://doi.org/10.1155/2019/8295054>
- 560 Bo, Y., Brook, J.R., Lin, C., Chang, L., Guo, C., Zeng, Y., Yu, Z., Tam, T., Lau, A.K.H., Lao,  
561 X.Q., 2021. Reduced Ambient PM<sub>2.5</sub> Was Associated with a Decreased Risk of Chronic  
562 Kidney Disease: A Longitudinal Cohort Study. *Environ. Sci. Technol.* 55, 6876–6883.  
563 <https://doi.org/10.1021/acs.est.1c00552>
- 564 Bravo, M.A., Son, J., de Freitas, C.U., Gouveia, N., Bell, M.L., 2016. Air pollution and mortality  
565 in São Paulo, Brazil: Effects of multiple pollutants and analysis of susceptible  
566 populations. *J Expo Sci Environ Epidemiol* 26, 150–161.  
567 <https://doi.org/10.1038/jes.2014.90>
- 568 Bureau, U. S. C., 2020. Behavioral Risk Factor Surveillance System (2005–2019).
- 569 Bureau, U. S. C., 2011. Summary File 1 Dataset.
- 570 Bureau, U. S. C., 2002. Summary File 3 Dataset.
- 571 Burnett, R., Chen, H., Szyszkowicz, M., Fann, N., Hubbell, B., Pope, C.A., Apte, J.S., Brauer,  
572 M., Cohen, A., Weichenthal, S., Coggins, J., Di, Q., Brunekreef, B., Frostad, J., Lim,  
573 S.S., Kan, H., Walker, K.D., Thurston, G.D., Hayes, R.B., Lim, C.C., Turner, M.C.,  
574 Jerrett, M., Krewski, D., Gapstur, S.M., Diver, W.R., Ostro, B., Goldberg, D., Crouse,  
575 D.L., Martin, R.V., Peters, P., Pinault, L., Tjepkema, M., van Donkelaar, A., Villeneuve,  
576 P.J., Miller, A.B., Yin, P., Zhou, M., Wang, L., Janssen, N.A.H., Marra, M., Atkinson,

- 577 R.W., Tsang, H., Quoc Thach, T., Cannon, J.B., Allen, R.T., Hart, J.E., Laden, F.,  
578 Cesaroni, G., Forastiere, F., Weinmayr, G., Jaensch, A., Nagel, G., Concin, H., Spadaro,  
579 J.V., 2018. Global estimates of mortality associated with long-term exposure to outdoor  
580 fine particulate matter. *Proceedings of the National Academy of Sciences* 115, 9592–  
581 9597. <https://doi.org/10.1073/pnas.1803222115>
- 582 Cai, X., Li, Z., Scott, E.M., Li, X., Tang, M., 2016. Short-term effects of atmospheric particulate  
583 matter on myocardial infarction: a cumulative meta-analysis. *Environ Sci Pollut Res* 23,  
584 6139–6148. <https://doi.org/10.1007/s11356-016-6186-3>
- 585 Camacho, X., Nedkoff, L., Wright, F.L., Nghiem, N., Buajitti, E., Goldacre, R., Rosella, L.C.,  
586 Seminog, O., Tan, E.J., Hayes, A., Hayen, A., Wilson, N., Blakely, T., Clarke, P., 2022.  
587 Relative contribution of trends in myocardial infarction event rates and case fatality to  
588 declines in mortality: an international comparative study of 1·95 million events in 80·4  
589 million people in four countries. *The Lancet Public Health* 7, e229–e239.  
590 [https://doi.org/10.1016/S2468-2667\(22\)00006-8](https://doi.org/10.1016/S2468-2667(22)00006-8)
- 591 Cesaroni, G., Forastiere, F., Stafoggia, M., Andersen, Z.J., Badaloni, C., Beelen, R., Caracciolo,  
592 B., Faire, U. de, Erbel, R., Eriksen, K.T., Fratiglioni, L., Galassi, C., Hampel, R., Heier,  
593 M., Hennig, F., Hilding, A., Hoffmann, B., Houthuijs, D., Jöckel, K.-H., Korek, M.,  
594 Lanki, T., Leander, K., Magnusson, P.K.E., Migliore, E., Ostenson, C.-G., Overvad, K.,  
595 Pedersen, N.L., J, J.P., Penell, J., Pershagen, G., Pyko, A., Raaschou-Nielsen, O., Ranzi,  
596 A., Ricceri, F., Sacerdote, C., Salomaa, V., Swart, W., Turunen, A.W., Vineis, P.,  
597 Weinmayr, G., Wolf, K., Hoogh, K. de, Hoek, G., Brunekreef, B., Peters, A., 2014. Long  
598 term exposure to ambient air pollution and incidence of acute coronary events:

- 
- 599 prospective cohort study and meta-analysis in 11 European cohorts from the ESCAPE  
600 Project. *BMJ* 348, f7412. <https://doi.org/10.1136/bmj.f7412>
- 601 Chadwick Jayaraj, J., Davatyan, K., Subramanian, S.S., Priya, J., 2019. Epidemiology of  
602 Myocardial Infarction, in: Pamukçu, B. (Ed.), *Myocardial Infarction*. IntechOpen.  
603 <https://doi.org/10.5772/intechopen.74768>
- 604 Chen, H., Zhang, Z., van Donkelaar, A., Bai, L., Martin, R.V., Lavigne, E., Kwong, J.C.,  
605 Burnett, R.T., 2020. Understanding the Joint Impacts of Fine Particulate Matter  
606 Concentration and Composition on the Incidence and Mortality of Cardiovascular  
607 Disease: A Component-Adjusted Approach. *Environ. Sci. Technol.* 54, 4388–4399.  
608 <https://doi.org/10.1021/acs.est.9b06861>
- 609 Chi, G., Hajat, A., Bird, C., Cullen, M., Griffin, B.A., Miller, K., Shih, R., Stefanick, M., Vedal,  
610 S., Whitsel, E., Kaufman, J., 2016. Individual and Neighborhood Socioeconomic Status  
611 and the Association between Air Pollution and Cardiovascular Disease. *Environmental*  
612 *Health Perspectives* 124. <https://doi.org/10.1289/EHP199>
- 613 Colmer, J., Hardman, I., Shimshack, J., Voorheis, J., 2020. Disparities in PM<sub>2.5</sub> air pollution in  
614 the United States. *Science* 369, 575–578. <https://doi.org/10.1126/science.aaz9353>
- 615 Cramer, J., Jørgensen, J.T., Hoffmann, B., Loft, S., Bräuner, E.V., Prescott, E., Ketznel, M.,  
616 Hertel, O., Brandt, J., Jensen, S.S., Backalarz, C., Simonsen, M.K., Andersen, Z.J., 2020.  
617 Long-Term Exposure to Air Pollution and Incidence of Myocardial Infarction: A Danish  
618 Nurse Cohort Study. *Environ Health Perspect* 128, 057003.  
619 <https://doi.org/10.1289/EHP5818>

- 620 Croft, D.P., Utell, M.J., Rich, D.Q., 2022. Can Long-Term Residential Air Cleaning Reduce  
621 Cardiovascular Morbidity in COPD Patients? *Am J Respir Crit Care Med* rccm.202211-  
622 2138ED. <https://doi.org/10.1164/rccm.202211-2138ED>
- 623 Danesh Yazdi, M., Wang, Y., Di, Q., Zanobetti, A., Schwartz, J., 2019. Long-term exposure to  
624 PM<sub>2.5</sub> and ozone and hospital admissions of Medicare participants in the Southeast USA.  
625 *Environment International* 130, 104879. <https://doi.org/10.1016/j.envint.2019.05.073>
- 626 DeFilippis, E.M., Singh, A., Divakaran, S., Gupta, A., Collins, B.L., Biery, D., Qamar, A.,  
627 Fatima, A., Ramsis, M., Pipilas, D., Rajabi, R., Eng, M., Hainer, J., Klein, J., Januzzi,  
628 J.L., Nasir, K., Di, C.M.F., Bhatt, D.L., Blankstein, R., 2018. Cocaine and Marijuana Use  
629 Among Young Adults With Myocardial Infarction. *Journal of the American College of*  
630 *Cardiology* 71, 2540–2551. <https://doi.org/10.1016/j.jacc.2018.02.047>
- 631 Di, Q., Amini, H., Shi, L., Kloog, I., Silvern, R., Kelly, J., Sabath, M.B., Choirat, C., Koutrakis,  
632 P., Lyapustin, A., Wang, Y., Mickley, L.J., Schwartz, J., 2020. Assessing NO<sub>2</sub>  
633 Concentration and Model Uncertainty with High Spatiotemporal Resolution across the  
634 Contiguous United States Using Ensemble Model Averaging. *Environ. Sci. Technol.* 54,  
635 1372–1384. <https://doi.org/10.1021/acs.est.9b03358>
- 636 Di, Q., Amini, H., Shi, L., Kloog, I., Silvern, R., Kelly, J., Sabath, M.B., Choirat, C., Koutrakis,  
637 P., Lyapustin, A., Wang, Y., Mickley, L.J., Schwartz, J., 2019. An ensemble-based model  
638 of PM<sub>2.5</sub> concentration across the contiguous United States with high spatiotemporal  
639 resolution. *Environment International* 130, 104909.  
640 <https://doi.org/10.1016/j.envint.2019.104909>



- 641 Druss, B.G., Bradford, W.D., Rosenheck, R.A., Radford, M.J., Krumholz, H.M., 2001. Quality  
642 of Medical Care and Excess Mortality in Older Patients With Mental Disorders. *Arch*  
643 *Gen Psychiatry* 58, 565. <https://doi.org/10.1001/archpsyc.58.6.565>
- 644 Feng, L., Wei, J., Liang, S., Sun, Z., Duan, J., 2020. miR-205/IRAK2 signaling pathway is  
645 associated with urban airborne PM2.5-induced myocardial toxicity. *Nanotoxicology* 14,  
646 1198–1212. <https://doi.org/10.1080/17435390.2020.1813824>
- 647 Frcpc, I.B., ChB, S.K.M., Osornio-Vargas, A.R., 2006. The effects of air pollution on the health  
648 of children 11.
- 649 Gandini, M., Scarinzi, C., Bande, S., Berti, G., Carnà, P., Ciancarella, L., Costa, G., Demaria,  
650 M., Ghigo, S., Piersanti, A., Rowinski, M., Spadea, T., Stroschia, M., Cadum, E., 2018.  
651 Long term effect of air pollution on incident hospital admissions: Results from the Italian  
652 Longitudinal Study within LIFE MED HISS project. *Environment International* 121,  
653 1087–1097. <https://doi.org/10.1016/j.envint.2018.10.020>
- 654 Gładka, A., Rymaszewska, J., Zatoński, T., 2018. Impact of air pollution on depression and  
655 suicide. *Int J Occup Med Environ Health* 31, 711–721.  
656 <https://doi.org/10.13075/ijomeh.1896.01277>
- 657 Gulati, R., Behfar, A., Narula, J., Kanwar, A., Lerman, A., Cooper, L., Singh, M., 2020. Acute  
658 Myocardial Infarction in Young Individuals. *Mayo Clinic Proceedings* 95, 136–156.  
659 <https://doi.org/10.1016/j.mayocp.2019.05.001>
- 660 Gwon, J.G., Park, J.H., Kim, J.S., Seo, H.-M., 2021. Exposure to Long-Term Air Pollution and  
661 Incidence of Peripheral Arterial Disease in the General Population: A National  
662 Population-Based Retrospective Cohort Study (preprint). In Review.  
663 <https://doi.org/10.21203/rs.3.rs-506193/v1>

- 664 Hart, J.E., Puett, R.C., Rexrode, K.M., Albert, C.M., Laden, F., 2015. Effect Modification of  
665 Long-Term Air Pollution Exposures and the Risk of Incident Cardiovascular Disease in  
666 US Women. *JAHA* 4, e002301. <https://doi.org/10.1161/JAHA.115.002301>
- 667 Hartiala, J., Breton, C.V., Tang, W.H.W., Lurmann, F., Hazen, S.L., Gilliland, F.D., Allayee, H.,  
668 2016. Ambient Air Pollution Is Associated With the Severity of Coronary Atherosclerosis  
669 and Incident Myocardial Infarction in Patients Undergoing Elective Cardiac Evaluation.  
670 *JAHA* 5, e003947. <https://doi.org/10.1161/JAHA.116.003947>
- 671 HCUP Databases, 2021. Healthcare Cost and Utilization Project (HCUP).
- 672 Hu, T., Zhu, P., Liu, Y., Zhu, H., Geng, J., Wang, B., Yuan, G., Peng, Y., Xu, B., 2021. PM2.5  
673 induces endothelial dysfunction via activating NLRP3 inflammasome. *Environmental*  
674 *Toxicology* 36, 1886–1893. <https://doi.org/10.1002/tox.23309>
- 675 Hystad, P., Larkin, A., Rangarajan, S., AlHabib, K.F., Avezum, Á., Calik, K.B.T., Chifamba, J.,  
676 Dans, A., Diaz, R., du Plessis, J.L., Gupta, R., Iqbal, R., Khatib, R., Kelishadi, R., Lanan,  
677 F., Liu, Z., Lopez-Jaramillo, P., Nair, S., Poirier, P., Rahman, O., Rosengren, A., Swidan,  
678 H., Tse, L.A., Wei, L., Wielgosz, A., Yeates, K., Yusoff, K., Zatoński, T., Burnett, R.,  
679 Yusuf, S., Brauer, M., 2020. Associations of outdoor fine particulate air pollution and  
680 cardiovascular disease in 157 436 individuals from 21 high-income, middle-income, and  
681 low-income countries (PURE): a prospective cohort study. *The Lancet Planetary Health*  
682 4, e235–e245. [https://doi.org/10.1016/S2542-5196\(20\)30103-0](https://doi.org/10.1016/S2542-5196(20)30103-0)
- 683 Inserte, J., Barrabés, J.A., Aluja, D., Otaegui, I., Bañeras, J., Castellote, L., Sánchez, A.,  
684 Rodríguez-Palomares, J.F., Pineda, V., Miró-Casas, E., Milà, L., Lidón, R.-M., Sambola,  
685 A., Valente, F., Rafecas, A., Ruiz-Meana, M., Rodríguez-Sinovas, A., Benito, B., Buera,  
686 I., Delgado-Tomás, S., Beneítez, D., Ferreira-González, I., 2021. Implications of Iron

- 687 Deficiency in STEMI Patients and in a Murine Model of Myocardial Infarction. *JACC*  
688 *Basic Transl Sci* 6, 567–580. <https://doi.org/10.1016/j.jacbts.2021.05.004>
- 689 Ito, K., Thurston, G.D., Silverman, R.A., 2007. Characterization of PM<sub>2.5</sub>, gaseous pollutants,  
690 and meteorological interactions in the context of time-series health effects models. *J*  
691 *Expo Sci Environ Epidemiol* 17, S45–S60. <https://doi.org/10.1038/sj.jes.7500627>
- 692 Kelly, F.J., Dunster, C., Mudway, I., 2003. Air pollution and the elderly: oxidant/antioxidant  
693 issues worth consideration. *European Respiratory Journal* 21, 70s–75s.  
694 <https://doi.org/10.1183/09031936.03.00402903>
- 695 Klepeis, N.E., Nelson, W.C., Ott, W.R., Robinson, J.P., Tsang, A.M., Switzer, P., Behar, J.V.,  
696 Hern, S.C., Engelmann, W.H., 2001. The National Human Activity Pattern Survey  
697 (NHAPS): a resource for assessing exposure to environmental pollutants. *J Expo Sci*  
698 *Environ Epidemiol* 11, 231–252. <https://doi.org/10.1038/sj.jea.7500165>
- 699 Langrish, J.P., Bosson, J., Unosson, J., Muala, A., Newby, D.E., Mills, N.L., Blomberg, A.,  
700 Sandström, T., 2012. Cardiovascular effects of particulate air pollution exposure: time  
701 course and underlying mechanisms. *Journal of Internal Medicine* 272, 224–239.  
702 <https://doi.org/10.1111/j.1365-2796.2012.02566.x>
- 703 Larsen, B.A., Christenfeld, N.J.S., 2009. Cardiovascular Disease and Psychiatric Comorbidity:  
704 The Potential Role of Perseverative Cognition. *Cardiovascular Psychiatry and Neurology*  
705 2009, 1–8. <https://doi.org/10.1155/2009/791017>
- 706 Leogrande, S., Alessandrini, E.R., Stafoggia, M., Morabito, A., Nocioni, A., Ancona, C.,  
707 Bisceglia, L., Mataloni, F., Giua, R., Mincuzzi, A., Minerba, S., Spagnolo, S., Pastore, T.,  
708 Tanzarella, A., Assennato, G., Forastiere, F., 2019. Industrial air pollution and mortality

- 709 in the Taranto area, Southern Italy: A difference-in-differences approach. *Environment*  
710 *International* 132, 105030. <https://doi.org/10.1016/j.envint.2019.105030>
- 711 Li, J., Liu, F., Liang, F., Huang, K., Yang, X., Xiao, Q., Chen, J., Liu, X., Cao, J., Chen, S.,  
712 Shen, C., Yu, L., Lu, F., Wu, Xianping, Zhao, L., Wu, Xigui, Li, Y., Hu, D., Huang, J.,  
713 Liu, Y., Lu, X., Gu, D., 2020. Long-Term Effects of High Exposure to Ambient Fine  
714 Particulate Matter on Coronary Heart Disease Incidence: A Population-Based Chinese  
715 Cohort Study. *Environ. Sci. Technol.* 54, 6812–6821.  
716 <https://doi.org/10.1021/acs.est.9b06663>
- 717 Lipsett, M.J., Ostro, B.D., Reynolds, P., Goldberg, D., Hertz, A., Jerrett, M., Smith, D.F., Garcia,  
718 C., Chang, E.T., Bernstein, L., 2011. Long-Term Exposure to Air Pollution and  
719 Cardiorespiratory Disease in the California Teachers Study Cohort. *Am J Respir Crit*  
720 *Care Med* 184, 828–835. <https://doi.org/10.1164/rccm.201012-2082OC>
- 721 Madrigano, J., Kloog, I., Goldberg, R., Coull, B.A., Mittleman, M.A., Schwartz, J., 2013. Long-  
722 term Exposure to PM<sub>2.5</sub> and Incidence of Acute Myocardial Infarction. *Environmental*  
723 *Health Perspectives* 121, 192–196. <https://doi.org/10.1289/ehp.1205284>
- 724 Malik, A.O., Jones, P.G., Chan, P.S., Peri-Okonny, P.A., Hejjaji, V., Spertus, J.A., 2019.  
725 Association of Long-Term Exposure to Particulate Matter and Ozone With Health Status  
726 and Mortality in Patients After Myocardial Infarction. *Circ: Cardiovascular Quality and*  
727 *Outcomes* 12, e005598. <https://doi.org/10.1161/CIRCOUTCOMES.119.005598>
- 728 Marchini, T., Magnani, N., Garces, M., Kelly, J., Paz, M., Caceres, L., Calabro, V., Lasagni  
729 Vitar, R., Caltana, L., Contin, M., Reynoso, S., Lago, N., Vico, T., Vanasco, V., Wolf,  
730 D., Tripodi, V., Gonzalez Maglio, D., Alvarez, S., Buchholz, B., Berra, A., Gelpi, R.,  
731 Evelson, P., 2022. Chronic exposure to polluted urban air aggravates myocardial

- 732 infarction by impaired cardiac mitochondrial function and dynamics. *Environmental*  
733 *Pollution* 295, 118677. <https://doi.org/10.1016/j.envpol.2021.118677>
- 734 McEwan, P.J., 2010. Empirical Research Methods in the Economics of Education, in: Peterson,  
735 P., Baker, E., McGaw, B. (Eds.), *International Encyclopedia of Education* (Third  
736 Edition). Elsevier, Oxford, pp. 187–192. [https://doi.org/10.1016/B978-0-08-044894-](https://doi.org/10.1016/B978-0-08-044894-7.01211-2)  
737 [7.01211-2](https://doi.org/10.1016/B978-0-08-044894-7.01211-2)
- 738 McGuinn, L.A., Ward-Caviness, C.K., Neas, L.M., Schneider, A., Diaz-Sanchez, D., Cascio,  
739 W.E., Kraus, W.E., Hauser, E., Dowdy, E., Haynes, C., Chudnovsky, A., Koutrakis, P.,  
740 Devlin, R.B., 2016. Association between satellite-based estimates of long-term PM<sub>2.5</sub>  
741 exposure and coronary artery disease. *Environmental Research* 145, 9–17.  
742 <https://doi.org/10.1016/j.envres.2015.10.026>
- 743 Miller, K.A., Siscovick, D.S., Sheppard, L., Shepherd, K., Sullivan, J.H., Anderson, G.L.,  
744 Kaufman, J.D., 2007. Long-Term Exposure to Air Pollution and Incidence of  
745 Cardiovascular Events in Women. *N Engl J Med* 356, 447–458.  
746 <https://doi.org/10.1056/NEJMoa054409>
- 747 Mohamed, M.O., Rashid, M., Farooq, S., Siddiqui, N., Parwani, P., Shiers, D., Thamman, R.,  
748 Gulati, M., Shoaib, A., Chew-Graham, C., Mamas, M.A., 2019. Acute Myocardial  
749 Infarction in Severe Mental Illness: Prevalence, Clinical Outcomes, and Process of Care  
750 in U.S. Hospitalizations. *Canadian Journal of Cardiology* 35, 821–830.  
751 <https://doi.org/10.1016/j.cjca.2019.04.021>
- 752 Mustafić, H., Jabre, P., Caussin, C., Murad, M.H., Escolano, S., Tafflet, M., Périer, M.-C.,  
753 Marijon, E., Vernerey, D., Empana, J.-P., Jouven, X., 2012. Main Air Pollutants and

- 754 Myocardial Infarction: A Systematic Review and Meta-analysis. *JAMA* 307, 713–721.  
755 <https://doi.org/10.1001/jama.2012.126>
- 756 Nawrot, T.S., Perez, L., Künzli, N., Munters, E., Nemery, B., 2011. Public health importance of  
757 triggers of myocardial infarction: a comparative risk assessment. *The Lancet* 377, 732–  
758 740. [https://doi.org/10.1016/S0140-6736\(10\)62296-9](https://doi.org/10.1016/S0140-6736(10)62296-9)
- 759 Newcomer, J.W., Hennekens, C.H., 2007. Severe Mental Illness and Risk of Cardiovascular  
760 Disease. *JAMA* 298, 1794. <https://doi.org/10.1001/jama.298.15.1794>
- 761 Ojha, N., Dhamoon, A.S., 2022. Myocardial Infarction, in: *StatPearls*. StatPearls Publishing,  
762 Treasure Island (FL).
- 763 Padda, J., Khalid, K., Hitawala, G., Batra, N., Pokhriyal, S., Mohan, A., Cooper, A.C., Jean-  
764 Charles, G., 2021. Acute Anemia and Myocardial Infarction. *Cureus* 13, e17096.  
765 <https://doi.org/10.7759/cureus.17096>
- 766 Palasubramaniam, J., Wang, X., Peter, K., 2019. Myocardial Infarction—From Atherosclerosis  
767 to Thrombosis. *Arteriosclerosis, Thrombosis, and Vascular Biology* 39, e176–e185.  
768 <https://doi.org/10.1161/ATVBAHA.119.312578>
- 769 Pereira, A.A., Sarnak, M.J., 2003. Anemia as a risk factor for cardiovascular disease. *Kidney*  
770 *International* 64, S32–S39. <https://doi.org/10.1046/j.1523-1755.64.s87.6.x>
- 771 Phillips, K., Luk, A., Soor, G.S., Abraham, J.R., Leong, S., Butany, J., 2009. Cocaine  
772 Cardiotoxicity. *Am J Cardiovasc Drugs* 9, 177–196. <https://doi.org/10.1007/BF03256574>
- 773 Puett, R.C., Hart, J.E., Yanosky, J.D., Paciorek, C., Schwartz, J., Suh, H., Speizer, F.E., Laden,  
774 F., 2009. Chronic Fine and Coarse Particulate Exposure, Mortality, and Coronary Heart  
775 Disease in the Nurses' Health Study. *Environmental Health Perspectives* 117, 1697–  
776 1701. <https://doi.org/10.1289/ehp.0900572>

- 777 Qiu, X., Wei, Y., Amini, H., Wang, C., Weisskopf, M., Koutrakis, P., Schwartz, J., 2022. Fine  
778 particle components and risk of psychiatric hospitalization in the U.S. *Science of The*  
779 *Total Environment* 849, 157934. <https://doi.org/10.1016/j.scitotenv.2022.157934>
- 780 Qiu, X., Wei, Y., Weisskopf, M., Spiro, A., Shi, L., Castro, E., Coull, B., Koutrakis, P.,  
781 Schwartz, J., 2023. Air pollution, climate conditions and risk of hospital admissions for  
782 psychotic disorders in U.S. residents. *Environmental Research* 216, 114636.  
783 <https://doi.org/10.1016/j.envres.2022.114636>
- 784 Rajagopalan, S., Al-Kindi, S.G., Brook, R.D., 2018. Air Pollution and Cardiovascular Disease:  
785 JACC State-of-the-Art Review. *Journal of the American College of Cardiology* 72,  
786 2054–2070. <https://doi.org/10.1016/j.jacc.2018.07.099>
- 787 Reich, B.J., Yang, S., Guan, Y., Giffin, A.B., Miller, M.J., Rappold, A., 2021. A Review of  
788 Spatial Causal Inference Methods for Environmental and Epidemiological Applications.  
789 *International Statistical Review* 89, 605–634. <https://doi.org/10.1111/insr.12452>
- 790 Rich, D.Q., Kipen, H.M., Zhang, J., Kamat, L., Wilson, A.C., Kostis, J.B., null, null, 2010.  
791 Triggering of Transmural Infarctions, but Not Nontransmural Infarctions, by Ambient  
792 Fine Particles. *Environmental Health Perspectives* 118, 1229–1234.  
793 <https://doi.org/10.1289/ehp.0901624>
- 794 Rich, D.Q., Özkaynak, H., Crooks, J., Baxter, L., Burke, J., Ohman-Strickland, P., Thevenet-  
795 Morrison, K., Kipen, H.M., Zhang, J., Kostis, J.B., Lunden, M., Hodas, N., Turpin, B.J.,  
796 2013. The Triggering of Myocardial Infarction by Fine Particles Is Enhanced When  
797 Particles Are Enriched in Secondary Species. *Environ. Sci. Technol.* 47, 9414–9423.  
798 <https://doi.org/10.1021/es4027248>

- 
- 799 Roswall, N., Raaschou-Nielsen, O., Ketzel, M., Gammelmark, A., Overvad, K., Olsen, A.,  
800 Sørensen, M., 2017. Long-term residential road traffic noise and NO<sub>2</sub> exposure in  
801 relation to risk of incident myocardial infarction – A Danish cohort study. *Environmental*  
802 *Research* 156, 80–86. <https://doi.org/10.1016/j.envres.2017.03.019>
- 803 Schneider, A., Neas, L.M., Graff, D.W., Herbst, M.C., Cascio, W.E., Schmitt, M.T., Buse, J.B.,  
804 Peters, A., Devlin, R.B., 2010. Association of cardiac and vascular changes with ambient  
805 PM<sub>2.5</sub> in diabetic individuals. *Part Fibre Toxicol* 7, 14. [https://doi.org/10.1186/1743-](https://doi.org/10.1186/1743-8977-7-14)  
806 [8977-7-14](https://doi.org/10.1186/1743-8977-7-14)
- 807 Schwartz, B.G., Rezkalla, S., Kloner, R.A., 2010. Cardiovascular Effects of Cocaine. *Circulation*  
808 122, 2558–2569. <https://doi.org/10.1161/CIRCULATIONAHA.110.940569>
- 809 Schwartz, J., Wei, Y., Yitshak-Sade, M., Di, Q., Dominici, F., Zanobetti, A., 2021. A national  
810 difference in differences analysis of the effect of PM<sub>2.5</sub> on annual death rates.  
811 *Environmental Research* 194, 110649. <https://doi.org/10.1016/j.envres.2020.110649>
- 812 Schwartz, J.D., Di, Q., Requia, W.J., Dominici, F., Zanobetti, A., 2021. A Direct Estimate of the  
813 Impact of PM<sub>2.5</sub>, NO<sub>2</sub>, and O<sub>3</sub> Exposure on Life Expectancy Using Propensity Scores.  
814 *Epidemiology* 32, 469–476. <https://doi.org/10.1097/EDE.0000000000001354>
- 815 Shi, L., Kloog, I., Zanobetti, A., Liu, P., Schwartz, J.D., 2015. Impacts of Temperature and its  
816 Variability on Mortality in New England. *Nat Clim Chang* 5, 988–991.  
817 <https://doi.org/10.1038/nclimate2704>
- 818 Shi, L., Wu, X., Danesh Yazdi, M., Braun, D., Abu Awad, Y., Wei, Y., Liu, P., Di, Q., Wang,  
819 Y., Schwartz, J., Dominici, F., Kioumourtzoglou, M.-A., Zanobetti, A., 2020. Long-term  
820 effects of PM<sub>2.5</sub> on neurological disorders in the American Medicare population: a



- 
- 821 longitudinal cohort study. *The Lancet Planetary Health* 4, e557–e565.  
822 [https://doi.org/10.1016/S2542-5196\(20\)30227-8](https://doi.org/10.1016/S2542-5196(20)30227-8)
- 823 Shumake, K.L., Sacks, J.D., Lee, J.S., Johns, D.O., 2013. Susceptibility of older adults to health  
824 effects induced by ambient air pollutants regulated by the European Union and the United  
825 States. *Aging Clin Exp Res* 25, 3–8. <https://doi.org/10.1007/s40520-013-0001-5>
- 826 Steiner, C., Elixhauser, A., Schnaier, J., 2002. The healthcare cost and utilization project: an  
827 overview. *Effective Clinical Practice* 5.
- 828 Stewart, S., Keates, A.K., Redfern, A., McMurray, J.J.V., 2017. Seasonal variations in  
829 cardiovascular disease. *Nat Rev Cardiol* 14, 654–664.  
830 <https://doi.org/10.1038/nrcardio.2017.76>
- 831 Valli, H., 2001. Gaseous pollutants in particulate matter epidemiology: confounders or  
832 surrogates? *Environmental Health Perspectives* 109.
- 833 Vodonos, A., Awad, Y.A., Schwartz, J., 2018. The concentration-response between long-term  
834 PM<sub>2.5</sub> exposure and mortality; A meta-regression approach. *Environmental Research*  
835 166, 677–689. <https://doi.org/10.1016/j.envres.2018.06.021>
- 836 Wang, G., Jiang, R., Zhao, Z., Song, W., 2013. Effects of ozone and fine particulate matter  
837 (PM<sub>2.5</sub>) on rat system inflammation and cardiac function. *Toxicology Letters* 217, 23–  
838 33. <https://doi.org/10.1016/j.toxlet.2012.11.009>
- 839 Wang, R., Xiao, X., Cao, L., Shen, Z., Lei, Y., Cao, Y., 2016. Airborne fine particulate matter  
840 induces an upregulation of endothelin receptors on rat bronchi. *Environmental Pollution*  
841 209, 11–20. <https://doi.org/10.1016/j.envpol.2015.10.043>

- 842 Wang, Y., Kloog, I., Coull, B.A., Kosheleva, A., Zanobetti, A., Schwartz, J.D., 2016. Estimating  
843 Causal Effects of Long-Term PM<sub>2.5</sub> Exposure on Mortality in New Jersey. *Environ*  
844 *Health Perspect* 124, 1182–1188. <https://doi.org/10.1289/ehp.1409671>
- 845 Wang, Y., Shi, L., Lee, M., Liu, P., Di, Q., Zanobetti, A., Schwartz, J.D., 2017. Long-term  
846 exposure to PM<sub>2.5</sub> and mortality among older adults in the Southeastern US.  
847 *Epidemiology* 28, 207–214. <https://doi.org/10.1097/EDE.0000000000000614>
- 848 Weaver, A.M., McGuinn, L., Neas, L., Mirowsky, J., Devlin, R.B., Dhingra, R., Ward-Caviness,  
849 C., Cascio, W.E., Kraus, W.E., Hauser, E.R., Di, Q., Schwartz, J., Diaz-Sanchez, D.,  
850 2019. Neighborhood Sociodemographic Effects on the Associations Between Long-term  
851 PM<sub>2.5</sub> Exposure and Cardiovascular Outcomes and Diabetes Mellitus. *Environ*  
852 *Epidemiol* 3, e038. <https://doi.org/10.1097/EE9.0000000000000038>
- 853 Wei, Y., Qiu, X., Yazdi, M.D., Shtein, A., Shi, L., Yang, J., Peralta, A.A., Coull, B.A., Schwartz,  
854 J.D., 2022. The Impact of Exposure Measurement Error on the Estimated Concentration–  
855 Response Relationship between Long-Term Exposure to PM<sub>2.5</sub> and Mortality. *Environ*  
856 *Health Perspect* 130, 077006. <https://doi.org/10.1289/EHP10389>
- 857 Wei, Y., Wang, Y., Wu, X., Di, Q., Shi, L., Koutrakis, P., Zanobetti, A., Dominici, F., Schwartz,  
858 J.D., 2020. Causal Effects of Air Pollution on Mortality Rate in Massachusetts. *Am J*  
859 *Epidemiol* 189, 1316–1323. <https://doi.org/10.1093/aje/kwaa098>
- 860 Weichenthal, S., Hoppin, J.A., Reeves, F., 2014. Obesity and the cardiovascular health effects of  
861 fine particulate air pollution. *Obesity* 22, 1580–1589. <https://doi.org/10.1002/oby.20748>
- 862 Weichenthal, S., Pinault, L.L., Burnett, R.T., 2017. Impact of Oxidant Gases on the Relationship  
863 between Outdoor Fine Particulate Air Pollution and Nonaccidental, Cardiovascular, and  
864 Respiratory Mortality. *Sci Rep* 7, 16401. <https://doi.org/10.1038/s41598-017-16770-y>

- 
- 865 Weisskopf, M.G., Webster, T.F., 2017. Trade-offs of Personal Versus More Proxy Exposure  
866 Measures in Environmental Epidemiology: *Epidemiology* 28, 635–643.  
867 <https://doi.org/10.1097/EDE.0000000000000686>
- 868 Wynands, Q., Cazorla, O., Gouzi, F., Grillet, P., Bourdin, A., 2022. Impact of air pollution and  
869 emphysema on cardiovascular and hemodynamic features. *European Respiratory Journal*  
870 60. <https://doi.org/10.1183/13993003.congress-2022.2866>
- 871 Xu, M., Sbihi, H., Pan, X., Brauer, M., 2020. Modifiers of the effect of short-term variation in  
872 PM<sub>2.5</sub> on mortality in Beijing, China. *Environmental Research* 183, 109066.  
873 <https://doi.org/10.1016/j.envres.2019.109066>
- 874 Yang, J., Biery, D.W., Singh, A., Divakaran, S., DeFilippis, E.M., Wu, W.Y., Klein, J., Hainer,  
875 J., Ramsis, M., Natarajan, P., Januzzi, J.L., Nasir, K., Bhatt, D.L., Di Carli, M.F.,  
876 Blankstein, R., 2020. Risk Factors and Outcomes of Very Young Adults Who Experience  
877 Myocardial Infarction: The Partners YOUNG-MI Registry. *The American Journal of*  
878 *Medicine* 133, 605-612.e1. <https://doi.org/10.1016/j.amjmed.2019.10.020>
- 879 Yang, L., Zhang, Y., Qi, W., Zhao, T., Zhang, L., Zhou, L., Ye, L., 2022. Adverse effects of  
880 PM<sub>2.5</sub> on cardiovascular diseases. *Reviews on Environmental Health* 37, 71–80.  
881 <https://doi.org/10.1515/reveh-2020-0155>
- 882 Yitshak-Sade, M., Kloog, I., Zanobetti, A., Schwartz, J.D., 2019. Estimating the causal effect of  
883 annual PM<sub>2.5</sub> exposure on mortality rates in the Northeastern and mid-Atlantic states.  
884 *Environmental Epidemiology* 3, e052. <https://doi.org/10.1097/EE9.0000000000000052>
- 885 Yu, B., Akushevich, I., Yashkin, A.P., Kravchenko, J., 2021. Epidemiology of Geographic  
886 Disparities of Myocardial Infarction Among Older Adults in the United States: Analysis  
887 of 2000–2017 Medicare Data. *Frontiers in Cardiovascular Medicine* 8.

- 
- 888 Zhao, J., Gao, Z., Tian, Z., Xie, Y., Xin, F., Jiang, R., Kan, H., Song, W., 2013. The biological  
889 effects of individual-level PM<sub>2.5</sub> exposure on systemic immunity and inflammatory  
890 response in traffic policemen. *Occup Environ Med* 70, 426–431.  
891 <https://doi.org/10.1136/oemed-2012-100864>
- 892 Zhu, W., Cai, J., Hu, Y., Zhang, H., Han, X., Zheng, H., Wu, J., 2021. Long-term exposure to  
893 fine particulate matter relates with incident myocardial infarction (MI) risks and post-MI  
894 mortality: A meta-analysis. *Chemosphere* 267, 128903.  
895 <https://doi.org/10.1016/j.chemosphere.2020.128903>  
896

---

897 **Supplementary Materials**

898

899 **Long-term Exposure to Ambient PM<sub>2.5</sub> and Hospitalizations for Myocardial Infarction**  
900 **among U.S. Residents: A Difference-in-Differences Analysis**

901 Yichen Wang<sup>a\*</sup>, Xinye Qiu<sup>a</sup>, Yaguang Wei<sup>a</sup>, Joel D. Schwartz<sup>a,b</sup>

902 <sup>a</sup> Department of Environmental Health, Harvard T.H. Chan School of Public Health, Boston, MA,  
903 USA

904 <sup>b</sup> Department of Epidemiology, Harvard T.H. Chan School of Public Health, Boston, MA, USA

905

906 \*Corresponding author: Yichen Wang, Department of Environmental Health, Harvard T.H. Chan  
907 School of Public Health, 401 Park Drive, Boston, MA 02215 USA. Email:

908 [yichenwang@hsph.harvard.edu](mailto:yichenwang@hsph.harvard.edu)

909

910

911 **Data S1. Supplemental Methods**

912 HCUP data are developed and managed through a Federal-State-Industry partnership  
913 sponsored by the Agency for Healthcare Research and Quality. By providing uniformly formatted  
914 datasets for multiple states, the data are aimed to facilitate health services research and improve  
915 health care delivery. The SIDs in HCUP data contain the inpatient discharge records from  
916 community hospitals in 49 participating states, which account for about 97% of all U.S. community  
917 hospital discharges. The coverage of SIDs reaches all patients regardless of payer, including  
918 individuals covered by Medicare, Medicaid, or private insurance, and those uninsured.

919 In the present study, we included the SIDs for the following ten states that were allowed  
 920 by our current funding budget for research use from HCUP: Arizona (AZ), Michigan (MI), North  
 921 Carolina (NC), New York (NY), Rhode Island (RI), Washington (WA), New Jersey (NJ),  
 922 Maryland (MD), Georgia (GA), and Wisconsin (WI). For GA, we only have access to the data  
 923 after 2010. For WI, we only have access to the data after 2012. For MD, residential address ZIP  
 924 code information is only available after 2008 and admission year information is only available  
 925 after 2009. For the other included states, we have the complete records from 2002 to 2016.

926

927

928 **Table S1.** Percent change in hospitalization rate for MI per 1- $\mu\text{g}/\text{m}^3$  increase in long-term  
 929 exposure to  $\text{PM}_{2.5}$  across different age groups.

| Age (years)         | % Change (95% CI) |
|---------------------|-------------------|
| <i>p</i> for trend* | <0.001            |
| 0-34                | 2.40 (1.62, 3.20) |
| 35-44               | 1.32 (0.93, 1.70) |
| 45-54               | 0.87 (0.59, 1.16) |
| 55-64               | 0.95 (0.68, 1.22) |
| 65-74               | 1.01 (0.75, 1.28) |
| $\geq 75$           | 1.94 (1.69, 2.20) |

930 \**p* for age trend was estimated from the adjusted model using age as a continuous term.

931

932

933 **Table S2.** Percent change in hospitalization rate for MI per 1- $\mu\text{g}/\text{m}^3$  increase in long-term  
 934 exposure to  $\text{PM}_{2.5}$  across different levels of SES factors.

| SES factors         | 10th percentile   | 90th percentile   | <i>p</i> for interaction |
|---------------------|-------------------|-------------------|--------------------------|
| Poverty             | 1.16 (0.86, 1.46) | 1.42 (1.17, 1.67) | 0.0497                   |
| Household income    | 1.31 (1.04, 1.57) | 1.44 (1.07, 1.80) | 0.5190                   |
| Population density  | 1.07 (0.82, 1.32) | 1.19 (0.95, 1.43) | <0.0001                  |
| High school or less | 1.30 (0.97, 1.63) | 1.37 (1.10, 1.65) | 0.6640                   |

935

936

937

938 **Table S3.** Interaction Odds Ratio (OR) for hospitalization for MI per 1- $\mu\text{g}/\text{m}^3$  increase in long-  
 939 term exposure to  $\text{PM}_{2.5}$  comparing individuals with and without comorbidities.

| Comorbidity                  | Cases (%)*     | OR (95% CI)          | <i>p</i> |
|------------------------------|----------------|----------------------|----------|
| Hypertension                 | 1067896 (69.4) | 1.037 (1.036, 1.039) | <0.001   |
| DM                           | 448683 (29.2)  | 1.039 (1.037, 1.041) | <0.001   |
| COPD                         | 324202 (21.1)  | 1.004 (1.002, 1.006) | <0.001   |
| Renal failure                | 290739 (18.9)  | 1.042 (1.039, 1.040) | <0.001   |
| IDA                          | 238974 (15.5)  | 1.056 (1.053, 1.058) | <0.001   |
| Obesity                      | 193034 (12.5)  | 1.007 (1.004, 1.011) | <0.001   |
| PVD                          | 169422 (11.0)  | 1.014 (1.011, 1.016) | <0.001   |
| Depression                   | 105388 (6.8)   | 0.995 (0.991, 0.998) | <0.001   |
| Other neurological disorders | 93109 (6.1)    | 1.017 (1.041, 1.055) | <0.001   |
| Psychoses                    | 31566 (2.1)    | 1.048 (1.041, 1.054) | <0.001   |

940 \* The proportion was calculated as the case count divided by the MI hospitalizations from 2005  
941 to 2015. DM, diabetes mellitus; COPD, chronic obstructive pulmonary disease; IDA, iron  
942 deficiency anemia; PVD, peripheral vascular disorders.
